RESEARCH ARTICLE

# Association of Serum Osteoprotegerin Levels with Bone Loss in Chronic Kidney Disease: Insights from the KNOW-CKD Study

Chang Seong Kim<sup>1</sup>, Eun Hui Bae<sup>1</sup>, Seong Kwon Ma<sup>1</sup>, Seung Hyeok Han<sup>2</sup>, Kyu Hun Choi<sup>2</sup>, Joongyub Lee<sup>3</sup>, Dong Wan Chae<sup>4</sup>, Kook-Hwan Oh<sup>4</sup>, Curie Ahn<sup>4</sup>, Soo Wan Kim<sup>1\*</sup>, Representatives of the KNOW-CKD Investigator Group<sup>1†</sup>

**1** Department of Internal Medicine, Chonnam National University Medical School, Gwangju, Korea, **2** Department of Internal Medicine, Yonsei University College of Medicine, Seoul, Korea, **3** Medical Research Collaborating Center, Seoul National University Hospital and Seoul National University College of Medicine, Seoul, Korea, **4** Department of Internal Medicine, Seoul National University, Seoul, Korea

<sup>††</sup> Membership of the KNOW-CKD Investigator Group is provided in the Acknowledgments.

\* [skimw@chonnam.ac.kr](mailto:skimw@chonnam.ac.kr)

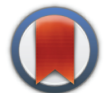

CrossMark  
click for updates

OPEN ACCESS

**Citation:** Kim CS, Bae EH, Ma SK, Han SH, Choi KH, Lee J, et al. (2016) Association of Serum Osteoprotegerin Levels with Bone Loss in Chronic Kidney Disease: Insights from the KNOW-CKD Study. PLoS ONE 11(11): e0166792. doi:10.1371/journal.pone.0166792

**Editor:** Hideharu Abe, Tokushima University Graduate School, JAPAN

**Received:** June 14, 2016

**Accepted:** November 3, 2016

**Published:** November 17, 2016

**Copyright:** © 2016 Kim et al. This is an open access article distributed under the terms of the [Creative Commons Attribution License](https://creativecommons.org/licenses/by/4.0/), which permits unrestricted use, distribution, and reproduction in any medium, provided the original author and source are credited.

**Data Availability Statement:** All relevant data are within the paper and its Supporting Information files.

**Funding:** This research was supported by grants 2011E3300300, 2012E3301100 and 2013E3301600 from Research of Korea Centers for Disease Control and Prevention, by a grant of the Korea Health Technology R&D Project through the Korea Health Industry Development Institute (KHIDI), funded by the Ministry of Health & Welfare, Republic of Korea (HI14C2084), by Basic Science Research Program through the National

## Abstract

Osteoprotegerin, a potent osteoclast activation inhibitor, decreases bone resorption and positively affects bone mineral density. This study examined the association between serum osteoprotegerin levels and bone loss in patients with chronic kidney disease, a condition associated with increased risk of mineral and bone disorders. The bone mineral densities of the lumbar spine, total hip, and femur neck were assessed by dual-energy X-ray absorptiometry; serum osteoprotegerin levels were measured at baseline for 1,423 patients enrolled in the prospective KoreaN cohort study for Outcome in patients With Chronic Kidney Disease (KNOW-CKD). Patients aged  $\geq 50$  years and with a T-score  $\leq -2.5$  were diagnosed as having osteoporosis. Multivariable linear regression analysis indicated independent association between serum osteoprotegerin levels and decreased bone mineral density in the lumbar spine (B:  $-0.489$ , 95% confidence interval [CI]:  $-0.883$  to  $-0.095$ ,  $P = 0.015$ ), and total hip (B:  $-0.349$ , 95% CI:  $-0.672$  to  $-0.027$ ,  $P = 0.027$ ). However, bone mineral density of the femur neck was not associated with serum osteoprotegerin levels in women. After adjustments, no independent association was found between serum osteoprotegerin levels and bone mineral density in men. In multivariable logistic regression analysis, serum osteoprotegerin levels were associated with increased risk of osteoporosis in women (odds ratio [OR]:  $4.72$ , 95% CI:  $1.35$  to  $16.52$ ,  $P = 0.015$ ), but not in men (OR:  $0.21$ ; 95% CI:  $0.04$  to  $1.31$ ,  $P = 0.095$ ). To summarize, in female patients with chronic kidney disease, increased serum osteoprotegerin levels were independently associated with decreased bone mineral density in the lumbar spine and total hip, and with increased risk of osteoporosis. Therefore, the measurement of serum osteoprotegerin concentration might be useful as a surrogate marker for determining bone loss in patients with chronic kidney disease, especially for women, although not so much for men.

Research Foundation of Korea (NRF) funded by the Ministry of Science, ICT and Future Planning (2016R1A2B4007870) and by the National Research Foundation of Korea (NRF) funded by the Ministry of Science, ICT & Future Planning (2015R1C1A1A01051769), Chonnam National University Hospital Institute for Biomedical Science (CRI14008-1). The funders had no role in study design, data collection and analysis, decision to publish, or preparation of the manuscript.

**Competing Interests:** The authors have declared that no competing interests exist.

## Introduction

Patients with mild to moderate chronic kidney disease (CKD), or end-stage renal disease have an increased risk for fracture because reduced kidney function is associated with bone loss [1, 2]. The Kidney Disease: Improving Global Outcomes guidelines suggest that bone mineral density (BMD) screening should not be performed routinely for CKD patients due to a lack of association between BMD and fractures in CKD patients with mineral bone disease [3]. However, recent studies showed that low BMD is a risk factor for fracture in patients with predialysis or dialysis CKDs [4–6]. Therefore, assessment of bone loss using BMD may provide information to help anticipate fractures in this high-risk population.

Osteoprotegerin (OPG) is a soluble member of the tumor necrosis factor receptor super family, and a decoy receptor for the receptor activator of nuclear factor- $\kappa$ B (RANK) ligand, which is predominantly expressed by osteoblasts and by the vascular endothelium. OPG plays a critical role in the regulation of bone turnover [7]. OPG specifically inhibits osteoclastic bone resorption and vascular calcification by interfering with binding of the RANK ligand to RANK, as well as promotes the survival of endothelial cells [8–11]. However, a pathological increase of OPG induced inflammation by leukocyte adhesion to endothelial cells [12]. In the clinical setting, a prospective, population-based Bruneck Study showed that OPG was an independent risk factor for the progression of atherosclerosis and for the onset of cardiovascular diseases [13]. Moreover, a cross-sectional study showed that serum OPG levels were positively associated with a high coronary artery calcification score, and could be used as a marker for severe coronary artery calcification in predialysis patients with diabetes [14].

Vascular calcification and bone loss frequently occur together and share same risk factors, such as aging and CKD. Although previous studies showed that serum OPG are associated with vascular calcification, there are limited data regarding the relation between serum OPG levels and bone loss in patients with CKD. A recent retrospective study showed that serum OPG negatively correlated with the BMD of the Ward's triangle in 31 predialysis patients, but this study population was too small to confirm the results [15]. Therefore, we evaluated the association between serum OPG levels, BMD levels, and osteoporosis in patients with CKD, based on a nationwide CKD cohort study, with further analysis regarding potential gender bias.

## Methods

### Ethics statement

The study protocol was approved by the institutional review board for each of the eight participating clinical centers, including the Seoul National University Hospital, Severance Hospital, Kangbuk Samsung Medical Center, Seoul St. Mary's Hospital, Gil Hospital, Eulji General Hospital, Chonnam National University Hospital, and Pusan Paik Hospital. All participating patients provided written informed consent. The KoreaN cohort study for Outcome in patients With Chronic Kidney Disease (KNOW-CKD) is supervised by the CKD advisory committee, which comprises individuals from the Korea Centers for Disease Control and Prevention, and from the Korean Society of Nephrology.

### Study design and patient population

KNOW-CKD was launched in 2011, and was a patient-based cohort study that enrolled ethnic Korean adults with CKD. Nephrologists working in clinical centers of the major university-

affiliated hospitals, as well as epidemiologists, pathologists, and biostatisticians of a research modulating center are participating in the KNOW-CKD. Data were collected by a well-trained study coordinator using a standardized case report form and protocol. Exclusion criteria included the following: a history of chronic dialysis, organ transplantation, heart failure (New York Heart Association class 3 or 4), liver cirrhosis (Child-Pugh class 2 or 3), history of malignancy, current pregnancy, or single-kidney due to trauma or kidney donation. The detailed design and methods of the KNOW-CKD were published previously [16].

First, we analyzed data recorded between June 2011 and December 2013 for 1,529 KNOW-CKD participants in order to identify the association between serum OPG levels and BMD. Of the 1,529 patients, 106 were excluded from our analysis because their serum OPG levels, BMDs, or T-scores of the lumbar spine, femoral neck, or total hip were not available. A total of 1,423 patients (mean age, 53.4 years; 61.2% men) remained. Second, of the 1,423 patients, those aged under 50 years ( $n = 497$ ) were excluded from our analysis for osteoporosis, because the target population for our study of osteoporosis prevalence was composed of individuals at higher risk of osteoporosis, namely men aged over 50 years and menopausal women, who are also expected to be aged over 50 years, as the mean age at menopause in Korean women is approximately 50 years [17, 18]. Finally, a total of 926 patients were included in the analysis of osteoporosis prevalence.

## Data collection and definitions

Baseline demographics and laboratory data were retrieved from the electronic data management system (PhactaX) with the assistance of the Division of Data Management of the Seoul National University Medical Research Collaborating Center. Anthropometric measurements including height and weight were conducted at the clinic. Serum samples were collected at baseline according to our standardized protocol, and sent to the central laboratory (Lab Genomics, Korea) for measurement of creatinine, intact parathyroid hormone (iPTH), and 25-OH vitamin D. Other laboratory data were analyzed at the hospital laboratory of each participating center. Serum creatinine concentration was measured using an isotope-dilution mass-spectrometry-traceable method. The definition of CKD stages 1–5 was based on the estimated glomerular filtration rate (eGFR), which was calculated using the four-variable Modification of Diet in Renal Disease (MDRD) formula [19]. The first-voided urine samples were tested for urine creatinine, albumin, and protein concentrations at the central laboratory (Lab Genomics, Korea). Detailed protocols for measurement of other laboratory parameters were previously described [16].

Osteoporosis was defined using the World Health Organization T-score criteria, which states that for the positive diagnosis either the femoral neck or lumbar spine dual-energy X-ray absorptiometry (DXA) scores must be 2.5 or more standard deviations below the sex-specific healthy-young-adult average [20].

## Measurement of serum OPG concentration

Serum OPG (BioVendor R&D) was measured in the central laboratory (Lab Genomics, Korea) by enzyme-linked immunosorbent assay kit. Intra- and inter-assay coefficients of variations were <4.9% and <9.0%, respectively. Samples were assayed in duplicate, and all results were reported as mean values.

## Measurement of bone mineral density

BMD testing was estimated using a Hologic DXA system (QDR4500A Scanner, software version 9.03). BMD was measured for the lumbar spine (L<sub>1</sub>-L<sub>4</sub>), total hip, and femoral neck at

baseline. Results were expressed as the T-score (standard deviation from the average BMD value of young normal subject's).

## Statistical analysis

We examined participant's characteristics by quartile of OPG concentrations. Serum OPG was skewed, and was therefore natural log-transformed or modeled in quartiles. The demographics and biochemical characteristics were evaluated using the one-way analysis of variance or the Kruskal-Wallis test, and the Pearson chi-square test for continuous variables and categorical variables, respectively. Continuous variables were expressed as mean  $\pm$  standard deviation or medians with interquartile (25<sup>th</sup> and 75<sup>th</sup> percentiles) ranges, and categorical variables were presented as the number and percentage of patients. The relationship between serum OPG levels and each BMD value was assessed using scatter plots. Multivariable linear regression was used to evaluate the association between serum OPG levels and each BMD value at baseline. Moreover, to evaluate the independent association between serum OPG and the risk of osteoporosis, multivariable logistic regression was used. To test whether the association of BMD and the risk of osteoporosis with serum OPG levels differed between male and female CKD patients, analyses were done separately by sex. Significant factors in the univariate analysis were selected as the variables for adjustment. We performed the following analyses: (1) unadjusted; (2) Model 1, adjusted for age and sex; (3) Model 2, adjusted for the variables in Model 1 plus body mass index (BMI); eGFR; log-transformed the urinary albumin-to-creatinine ratio (UACR); diabetes mellitus; hypertension; history of coronary artery disease, cerebrovascular accident, and peripheral vascular disease; current/former smoker; level of total calcium, inorganic phosphate, alkaline phosphatase, serum albumin, intact parathyroid hormone (iPTH), 25-OH vitamin D, and abdominal aortic calcification (AAC) score. Finally, to examine the ability of serum OPG concentrations measures to predict the risk of osteoporosis, we used receiver operating characteristics (ROC) curves. All statistical tests were two-tailed and  $P < 0.05$  was considered significant. The analyses were performed using the Statistical Package for Social Sciences software, version 21.0 (IBM Corp, Armonk, NY, USA).

## Results

### Baseline characteristics

The demographic, clinical, and biochemical characteristics of the patients according to quartile concentration are shown in [Table 1](#). The average baseline eGFR was  $49.1 \pm 29.6$  mL/min per  $1.73 \text{ m}^2$ , and the median serum OPG concentration was 5.94 pmol/L for the subjects in our study. Compared to patients with serum OPG concentrations in the lowest quartile, patients with higher serum OPG concentrations were older; had a higher prevalence of diabetes, hypertension, coronary artery disease, cerebral vascular accident, and peripheral artery disease; had higher AAC score, inorganic phosphate, total alkaline phosphatase, iPTH, and UACR; and lower total calcium, serum albumin levels, and baseline eGFR. Log-transformed serum OPG concentration correlated with higher CKD stage, and lower eGFR ( $r = -0.484$ ,  $P < 0.001$ ; [S1 Fig](#)). [Fig 1](#) shows the regression plots between log-transformed serum OPG concentrations and T-scores for lumbar spine, femoral neck, and total hip BMDs in women and men, respectively. Serum OPG concentration was negatively correlated with lumbar spine ( $r = -0.123$ ,  $P < 0.001$ ), femoral neck ( $r = -0.351$ ,  $P < 0.001$ ), and total hip BMDs ( $r = -0.287$ ,  $P < 0.001$ ) in total cohort. Especially, the negative correlations between serum OPG levels and BMDs of lumbar spine, femoral neck, and total hip are higher for women ( $r = -0.299$ ,  $P < 0.001$ ;  $r = -0.400$ ,  $P < 0.001$ ;  $r = -0.342$ ,  $P < 0.001$ , respectively), and lower for men.

**Table 1. Baseline distribution of demographic, clinical, and biochemical characteristics of the study population according to quartile groups of the distribution of values of serum osteoprotegerin levels.**

| Serum OPG                  | 1st quartile (n = 356) | 2nd quartile (n = 355) | 3rd quartile (n = 356) | 4th quartile (n = 356) | P value |
|----------------------------|------------------------|------------------------|------------------------|------------------------|---------|
| Parameters                 | (≤ 4.39 pmol/L)        | (4.40–5.93 pmol/L)     | (5.94–8.17 pmol/L)     | (≥ 8.18 pmol/L)        |         |
| Age (year)                 | 43.5 ± 10.7            | 51.4 ± 10.8            | 56.3 ± 11.0            | 62.5 ± 8.2             | <0.001  |
| Male (%)                   | 230 (64.6)             | 210 (59.2)             | 214 (60.1)             | 217 (61.0)             | 0.466   |
| Systolic BP (mmHg)         | 124 ± 15               | 127 ± 15               | 129 ± 15               | 132 ± 19               | <0.001  |
| Diastolic BP (mmHg)        | 77 ± 11                | 78 ± 11                | 76 ± 11                | 76 ± 12                | 0.070   |
| Current/former Smoker (%)  | 171 (48.0)             | 165 (46.5)             | 169 (47.6)             | 179 (50.3)             | 0.145   |
| BMI (kg/m <sup>2</sup> )   | 24.2 ± 3.4             | 24.6 ± 3.5             | 24.5 ± 3.4             | 24.1 ± 3.0             | 0.161   |
| Diabetes (%)               | 35 (10.4)              | 87 (25.4)              | 130 (37.4)             | 222 (62.7)             | <0.001  |
| Hypertension (%)           | 300 (89.6)             | 328 (95.9)             | 331 (95.1)             | 340 (96.0)             | <0.001  |
| CAD (%)                    | 5 (1.5)                | 25 (7.3)               | 31 (8.9)               | 49 (13.8)              | <0.001  |
| CVA (%)                    | 10 (3.0)               | 20 (5.8)               | 32 (9.2)               | 57 (16.1)              | <0.001  |
| PAD (%)                    | 1 (0.3)                | 0 (0)                  | 8 (2.3)                | 15 (4.2)               | <0.001  |
| AAC score                  | 0.34 ± 1.28            | 0.83 ± 2.16            | 1.39 ± 2.77            | 2.43 ± 3.51            | <0.001  |
| Total calcium (mg/dL)      | 9.23 ± 0.43            | 9.20 ± 0.45            | 9.11 ± 0.59            | 8.92 ± 0.55            | <0.001  |
| iP (mg/dL)                 | 3.50 ± 0.58            | 3.64 ± 0.58            | 3.73 ± 0.66            | 3.92 ± 0.75            | <0.001  |
| Intact PTH (pg/mL)         | 50.6 (35.3,69.5)       | 39.8 (27.0,63.9)       | 46.1 (31.1,72.8)       | 55.5 (35.5,91.5)       | <0.001  |
| 25(OH) vitamin D (pg/mL)   | 15.6 (10.6,20.7)       | 16.8 (12.3,22.4)       | 17.0 (12.7,24.8)       | 15.8 (11.2,22.4)       | 0.007   |
| Total ALP (U/L)            | 64.5 (53.3,93.8)       | 62.0 (47.0,80.0)       | 65.0 (51.0,86.0)       | 71.0 (57.0,93.0)       | <0.001  |
| Serum albumin (mg/dL)      | 4.32 ± 0.33            | 4.22 ± 0.37            | 4.17 ± 0.40            | 4.02 ± 0.43            | <0.001  |
| Baseline Cr (mg/dL)        | 1.35 ± 0.76            | 1.63 ± 0.95            | 1.92 ± 1.14            | 2.57 ± 1.42            | <0.001  |
| Baseline eGFR <sup>a</sup> | 68.0 ± 31.8            | 54.6 ± 29.7            | 43.8 ± 23.2            | 30.4 ± 17.5            | <0.001  |
| Log-UACR (mg/g)            | 4.89 ± 1.81            | 5.31 ± 1.87            | 5.75 ± 1.90            | 6.25 ± 1.68            | <0.001  |
| VTDR (%)                   | 13 (10.9)              | 22 (14.8)              | 15 (9.6)               | 26 (16.6)              | 0.243   |
| AVD (%)                    | 3 (2.5)                | 8 (5.4)                | 13 (8.3)               | 17 (10.8)              | 0.043   |
| CPB (%)                    | 17 (14.3)              | 42 (26.8)              | 31 (19.9)              | 47 (29.9)              | 0.010   |

<sup>a</sup> eGFR is given in ml/min per 1.73m<sup>2</sup>, calculated using the MDRD equation

Abbreviations: OPG, osteoprotegerin; BP, blood pressure; BMI, body mass index; CAD, coronary artery disease; CVA, cerebrovascular accident; PAD, peripheral artery disease; AAC, abdominal aorta calcification; iP, inorganic phosphate; PTH, parathyroid hormone; ALP, alkaline phosphatase; Cr, creatinine; eGFR, estimated glomerular filtration rate; UACR, urinary albumin-creatinine ratio; VTDR, vitamin D replacement; AVD, active vitamin D; CPD, calcium phosphate binders

doi:10.1371/journal.pone.0166792.t001

### Association of serum OPG levels with BMD

We analyzed serum OPG concentration as a continuous variable. The analysis showed that serum OPG levels were associated with BMDs in sequential adjusted models (Table 2). In total cohort, higher serum OPG concentration associated with lower lumbar spine BMD, even after fully adjustment (B, -0.338; 95% CI, -0.599, -0.007; P = 0.011). However, femoral neck and total hip BMD did not have association after sequential adjustments. In women, serum OPG concentration were significantly associated with decreased lumbar spine, and total hip BMD, even after sequential adjustments (B, -0.489; 95% CI, -0.883, -0.095; P = 0.015; B, -0.349; 95% CI, -0.672, -0.027; P = 0.027, respectively). However, serum OPG concentration was not significantly associated with any BMDs in the final multivariable model for men.

### Association of serum OPG levels with osteoporosis

We also performed the multivariable logistic regression analysis to determine the association between serum OPG concentration and the risk of osteoporosis in patients with CKD

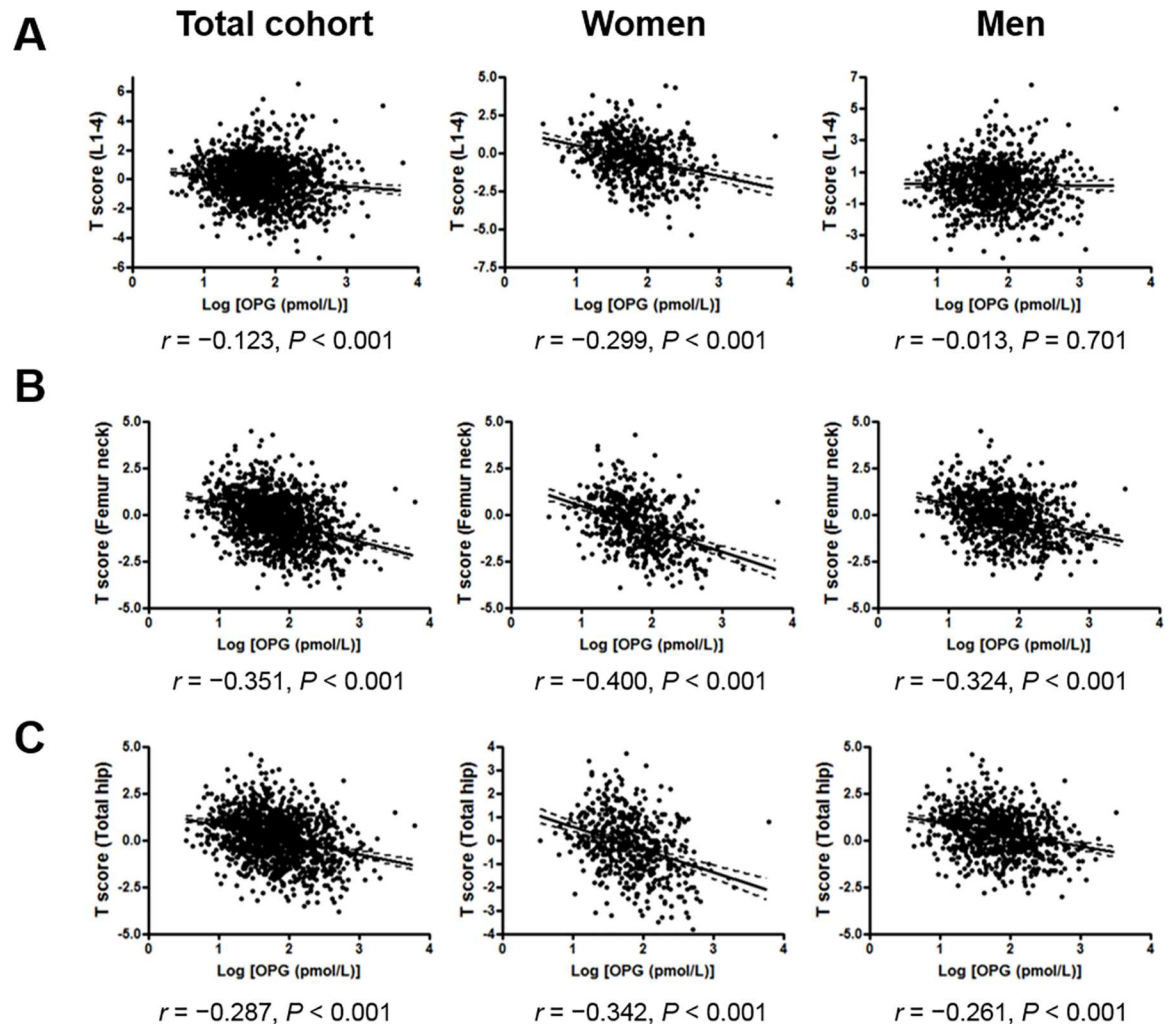

**Fig 1.** Regression plots between serum osteoprotegerin levels and the bone mineral densities of the (A) lumbar spine, (B) femoral neck, and (C) total hip in chronic kidney disease patients (total cohort, women, men).

doi:10.1371/journal.pone.0166792.g001

(Table 3). Serum OPG concentration was associated with an increased risk of osteoporosis for women (odds ratio, 4.719; 95% CI, 1.348–16.520;  $P = 0.015$ ), but these associations were not found for men in either unadjusted or adjusted analyses. The ROC curves analyses for the prevalence of osteoporosis regarding serum OPG concentration in men and women are plotted in Fig 2. The area under the curve (AUC) was 0.684 (95% CI, 0.617–0.751;  $P < 0.001$ ) for women, and 0.573 (95% CI, 0.467–0.678;  $P = 0.155$ ) for men, respectively.

## Discussion

The present study investigated the association of serum OPG concentration with BMD and with the risk of osteoporosis in predialysis CKD patients. We showed that serum OPG concentration was significantly correlated with decreased lumbar spine and total hip BMDs in female CKD patients. Moreover, serum OPG concentration was independently associated with increased risk of osteoporosis in both populations. However, there are no independent associations of serum OPG concentration with any BMDs or with the risk of osteoporosis in male CKD patients after adjusting for covariates. These findings suggest that the measurement of

**Table 2. Multivariable linear regression analysis between bone mineral density and log-transformed serum osteoprotegerin levels for patients with chronic kidney disease.**

| Log OPG (pmol/L)                   | Total cohort (n = 1423) |         | Women (n = 552)         |         | Men (n = 871)           |         |
|------------------------------------|-------------------------|---------|-------------------------|---------|-------------------------|---------|
|                                    | B Value (95% CI)        | P value | B Value (95% CI)        | P value | B Value (95% CI)        | P value |
| <b>L<sub>1</sub>-L<sub>4</sub></b> |                         |         |                         |         |                         |         |
|                                    | -0.007 ± 1.480          |         | -0.323 ± 1.491          |         | 0.193 ± 1.432           | <0.001  |
| Unadjusted                         | -0.390 (-0.554, -0.226) | <0.001  | -1.007 (-1.277, -0.738) | <0.001  | -0.039 (-0.238, 0.160)  | 0.701   |
| Model 1 <sup>a</sup>               | -0.316 (-0.517, -0.116) | 0.002   | -0.505 (-0.829, -0.181) | 0.002   | -0.195 (-0.422, 0.052)  | 0.122   |
| Model 2 <sup>b</sup>               | -0.338 (-0.599, -0.077) | 0.011   | -0.489 (-0.883, -0.095) | 0.015   | -0.179 (-0.518, 0.159)  | 0.298   |
| <b>Femur neck</b>                  |                         |         |                         |         |                         |         |
|                                    | -0.245 ± 1.292          |         | -0.528 ± 1.369          |         | -0.066 ± 1.207          | <0.001  |
| Unadjusted                         | -0.975 (-1.111, -0.840) | <0.001  | -1.239 (-1.477, -1.022) | <0.001  | -0.818 (-0.976, -0.659) | <0.001  |
| Model 1 <sup>a</sup>               | -0.514 (-0.674, -0.353) | <0.001  | -0.640 (-0.919, -0.360) | <0.001  | -0.437 (-0.629, -0.244) | <0.001  |
| Model 2 <sup>b</sup>               | -0.159 (-0.369, 0.051)  | 0.137   | -0.224 (-0.566, 0.117)  | 0.198   | -0.147 (-0.416, 0.121)  | 0.282   |
| <b>Total hip</b>                   |                         |         |                         |         |                         |         |
|                                    | 0.188 ± 1.235           |         | -0.206 ± 1.250          |         | 0.440 ± 1.158           | <0.001  |
| Unadjusted                         | -0.759 (-0.893, -0.625) | <0.001  | -0.965 (-1.190, -0.741) | <0.001  | -0.627 (-0.784, -0.469) | <0.001  |
| Model 1 <sup>a</sup>               | -0.479 (-0.637, -0.320) | <0.001  | -0.591 (-0.863, -0.320) | <0.001  | -0.410 (-0.604, -0.216) | <0.001  |
| Model 2 <sup>b</sup>               | -0.181 (-0.386, 0.024)  | 0.083   | -0.349 (-0.672, -0.027) | 0.027   | -0.062 (-0.332, 0.207)  | 0.649   |

<sup>a</sup> Adjusted for age and sex

<sup>b</sup> Adjusted for age; sex; BMI; eGFR; log-UACR; history of hypertension, diabetes mellitus, cerebrovascular accident, coronary artery disease, and peripheral vascular disease; current/former smoker; levels of total calcium, inorganic phosphate, alkaline phosphatase, serum albumin, intact PTH, and 25-OH vitamin D; and AAC score

Abbreviations: OPG, osteoprotegerin; CI, Confidence Interval

doi:10.1371/journal.pone.0166792.t002

serum OPG concentration in patients with CKD might be useful as a surrogate marker for determining the bone loss, especially for women, and not so much for men.

OPG-deficient mice exhibit a decrease in total bone density and medial calcification of the aorta and renal arteries, suggesting that OPG deficiency is associated with osteoporosis and vascular calcification [21]. In addition, transgenic overexpression of OPG in OPG-deficient mice effectively rescues the osteoporotic bone phenotype typically observed in these mice [22]. On the other hand, several experimental studies showed that a pathological increase of OPG levels may contribute to inflammation in the endothelium and ischemic brain, which is characteristic to cardiovascular disease [12, 23]. Recent clinical studies have shown that a high OPG level is associated with cardiovascular disease including acute myocardial infarction and heart failure, vascular calcification, and low BMD in patients with CKD, which is in agreement with our findings [13, 14, 24, 25]. Although it is possible that increased OPG production and release, leading to OPG levels above the physiologic concentration, may decrease bone density and contribute to the vascular pathologic condition, further studies are required to determine the causal relationship between increased OPG levels and lower BMD in CKD patients.

Several studies showed the existence of a relationship between serum OPG levels and BMD in the older population [26–31]. In a cross-sectional study that enrolled 185 postmenopausal women with osteoporosis, the plasma OPG levels were inversely related to spine and femoral neck BMDs even after adjustment, and were shown to contribute to the development of osteoporosis [26]. In addition, serum OPG levels were negatively correlated with lumbar spine and femoral neck BMDs for middle-aged men [30]. However, higher levels of OPG were associated with higher BMDs at the lumbar spine, femoral neck, and total hip for women using estrogen,

**Table 3. Multivariable logistic regression analysis of the association between log-transformed serum osteoprotegerin levels and risk of osteoporosis in patients with chronic kidney disease (n = 926, age ≥ 50 years).**

|                               | Odds ratio | 95% CI       | P value |
|-------------------------------|------------|--------------|---------|
| <b>Total cohort (n = 926)</b> |            |              |         |
| Unadjusted                    | 2.902      | 1.813–4.644  | <0.001  |
| Model 1 <sup>a</sup>          | 2.305      | 1.340–3.962  | 0.003   |
| Model 2 <sup>b</sup>          | 1.477      | 0.614–3.555  | 0.384   |
| <b>Women (n = 340)</b>        |            |              |         |
| Unadjusted                    | 5.209      | 2.584–10.503 | <0.001  |
| Model 1 <sup>a</sup>          | 3.727      | 1.765–7.871  | 0.001   |
| Model 2 <sup>b</sup>          | 4.719      | 1.348–16.520 | 0.015   |
| <b>Men (n = 586)</b>          |            |              |         |
| Unadjusted                    | 1.566      | 0.726–3.380  | 0.253   |
| Model 1 <sup>a</sup>          | 1.298      | 0.554–3.043  | 0.548   |
| Model 2 <sup>b</sup>          | 0.213      | 0.035–1.309  | 0.095   |

<sup>a</sup> Adjusted for age and sex

<sup>b</sup> Adjusted for age; sex; BMI; eGFR; log-UACR; history of hypertension, diabetes mellitus, cerebrovascular accident, coronary artery disease, and peripheral vascular disease; current/former smoker; levels of total calcium, inorganic phosphate, alkaline phosphatase, serum albumin, intact PTH, and 25-OH vitamin D; and AAC score

Abbreviations: CI, Confidence Interval

doi:10.1371/journal.pone.0166792.t003

but not for non-users; and higher levels of OPG were associated with higher BMD at the lumbar spine for men [27]. Nevertheless, other studies found no association between serum OPG and BMD for men or women [32–35]. Although poor renal function is significantly associated with decreased BMD [2], the reason for these conflicting results is unclear. The conflicting results might be related to differences between populations; hormone replacement therapy; or to the fact that most study populations had normal renal function, or did not present available data regarding renal function at baseline.

To date, there are few studies examining the relation between levels of OPG and BMD in patients with CKD or end-stage renal disease, conditions associated with an increased risk of mineral and bone disorders, or bone loss [15, 36]. In a cross-sectional study, 132 patients with predialysis CKD were evaluated based on Z scores of the femoral neck and trochanter. Only the femoral neck Z score was negatively associated with OPG levels [36]. Another cross-section study by Jiang *et al.* examined the association of serum OPG concentration with BMD for 31 participants with predialysis CKD and 16 participants undergoing hemodialysis. In predialysis CKD patients, serum OPG concentration negatively correlated with the BMD of the Ward’s triangle after adjustment, but not with those of the lumbar spine, femoral neck, or trochanter. However, there was no correlation between serum OPG concentration and any BMDs in hemodialysis patients [15]. Although the population enrolled in these cross-sectional studies was small, they showed similar results to our findings regarding the negative association between serum OPG levels and BMDs in patients with predialysis CKD.

However, in our study, only lumbar spine BMD was significantly associated with serum OPG levels for the total cohort, while the BMD at lumbar spine, and total hip were associated with serum OPG levels for women, independent of the abdominal aorta calcification, which may have overestimated the lumbar spine BMD. The reason for discordance in the results regarding the relevant site of BMD in ours and previous studies is unclear. Both cortical and



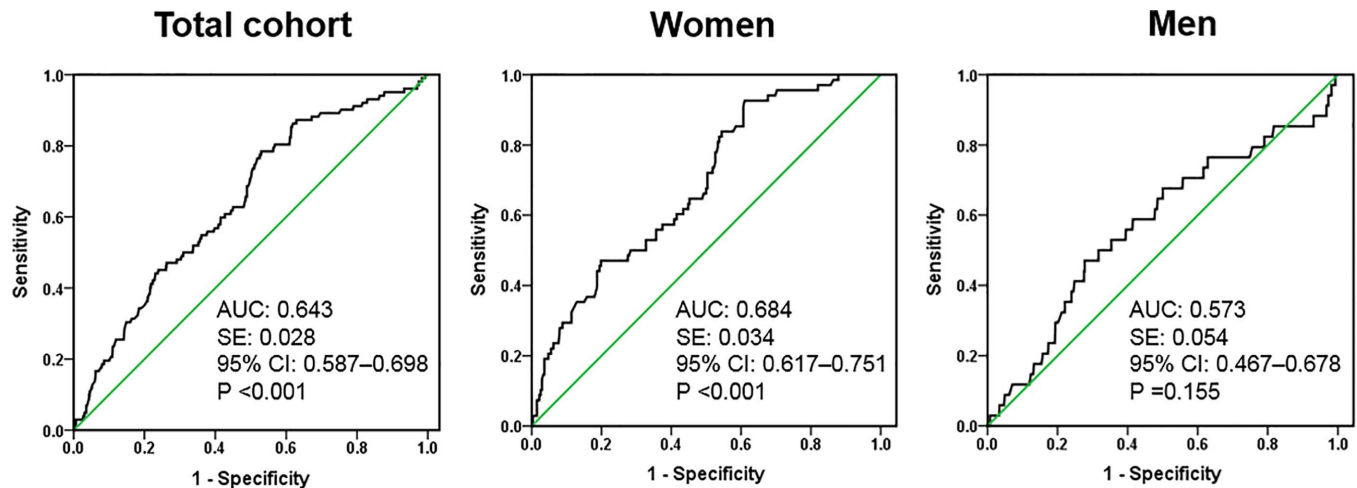

**Fig 2. Receiver operating characteristics analysis of the risk of osteoporosis with respect to serum OPG levels in chronic kidney disease patients (total cohort, women, men).**

doi:10.1371/journal.pone.0166792.g002

trabecular bones are typically decreased in osteoporosis; however, the mineral bone disease in CKD patients with high PTH levels predominantly decreases the cortical bone, but increases the trabecular bone [3, 37]. Moreover, OPG might affect the cortical and trabecular bones, which may have caused OPG-deficient mice to exhibit a concomitant osteoporotic bone phenotype in an experimental study [7]. However, particular sites, such as the forearm, consist predominantly of cortical bone, while 42% of the vertebral body, and 25% the proximal femur consist of trabecular bone [3]. Taken together, the bone loss configuration at certain skeletal sites, regarding cortical and trabecular bones, might account for the differences, for patient with CKD, in the associations of serum OPG levels with BMDs measured at skeletal sites that have mixed characteristics of bone mineral disease and osteoporosis. Therefore, further studies are needed in order to evaluate the association of serum OPG levels with the cortical and trabecular bone densities in more detail, using high-resolution peripheral quantitative computed tomography.

We found that women had significantly lower BMDs and higher incidence of osteoporosis, especially in women aged over 50 years (data not shown). In our unadjusted analysis, the association between serum OPG levels and BMD was seen for both men and women. However, after adjustment, serum OPG levels were significantly associated with the lumbar spine and total hip BMDs, as well as with the risk of osteoporosis for women. Although several studies indicated a gender bias in the association between serum OPG and BMD in general population, the underlying mechanisms of such gender bias are not well established. Regarding the concentrations of OPG in men and women, a previous study showed that serum OPG levels were higher in women who were using estrogen replacement therapy than in non-user [35]. These results are consistent with *in vitro* studies showing that estrogen administration increased OPG expression, whereas testosterone has an opposite effect [38–42]. Unfortunately, while we did not measure levels of estrogen and testosterone, or record the history of hormonal replacement therapy in our population, we noted no differences in serum OPG concentration between men and women. Hence, we suppose that not only sexual hormones, but also other genetic factors may affect the underlying bone histology and the gender bias, regarding the association of serum OPG levels with BMD and osteoporosis in CKD patients [43].

This study has several limitations. First, despite the fact that the association of serum OPG levels with BMD and with risk of osteoporosis persisted after adjusting for age and other

important confounders, we could not rule out the possibility that uncontrolled confounding factors affected our results. Second, this study could not evaluate the levels of estrogen and testosterone, the history of use of oral contraceptives or hormonal replacement therapy, the effects of such hormones on bone turnover, or their biologic interaction with OPG. Thus, the effects of sexual hormones on serum OPG and BMD could not be evaluated. Third, with the progress of the CKD, the underlying bone pathology including cortical or trabecular bone loss naturally becomes more complicated. However, by measuring BMDs using DXA, our study was not able to discriminate between cortical and trabecular bone densities, even though DXA is widely used for measuring osteoporosis in clinical setting [44]. In spite of these limitations, our findings raise the possibility that serum OPG levels may be associated with bone loss, and involved in the risk of osteoporosis for female CKD patients. Moreover, our study included a relatively large population, and determined the gender differences for these associations.

## Conclusion

In predialysis CKD patients, serum OPG levels were independently associated with lumbar spine and total hip BMDs, and with increased risk of osteoporosis for women. However, these associations were not found for men. Additional studies are needed in order to determine whether serum OPG levels represent a cause or an effect of bone loss, and to investigate the therapeutic effect of OPG on bone loss for the predialysis CKD population.

## Supporting Information

**S1 Fig.** (A) Serum osteoprotegerin concentration for each chronic kidney disease stage. (B) Regression plot between estimated glomerular filtration rate and serum osteoprotegerin levels. (TIF)

## Acknowledgments

### The KNOW-CKD Investigator Group

**Patient Recruitment.** *Seoul National University Hospital*, Curie Ahn, MD (PI, [Curie@snu.ac.kr](mailto:Curie@snu.ac.kr)), Kook-Hwan Oh, MD (SubPI), Hajeong Lee, MD, Seungmi Lee, RN, Jiseon Kim, RN, and Aram Lee, RN. *Seoul National University Bundang Hospital*, Dong Wan Chae, MD (SubPI), Seon Ha Baek MD, and Hyun Jin Cho, RN. *Yonsei University, Severance Hospital*, Kyu Hun Choi, MD (SubPI), Seung Hyeok Han, MD, Tae Hyun Yoo, MD, and Mi Hyun Yu, RN. *Kangbuk Samsung Hospital*, Kyu-Beck Lee, MD and Young Youl Hyun, MD. *The Catholic University of Korea, Seoul St. Mary's Hospital*, Yong-Soo Kim, MD and Min Jung Ahn, RN. *Gachon University, Gil Hospital*, Wookyung Chung, MD, Ji Yong Jung, MD, Youkyoung Jang, RN, and Ji Hye Park, RN. *Eulji Medical Center, Eulji University*. Suah Sung, MD, Sung Woo Lee, MD, and Min A Yoo, RN. *Chonnam National University Hospital*, Soo Wan Kim, MD, Seong Kwon Ma, MD, Eun Hui Bae, MD, Chang Seong Kim, MD, Yong Un Kang, MD, Ha Yeon Kim, MD, and Ji Seon Lee, RN. *Inje University, Pusan Paik Hospital*, Yeong Hoon Kim, MD, Sun Woo Kang, MD, Tae Hee Kim, MD and A Jin Son, RN.

**Polycystic Kidney Disease Research.** *Seoul National University Boramae Medical Center*, Yun Kyu Oh, MD (SubPI)

**Epidemiology and Biostatistics.** Department of Preventive Medicine, Seoul National University College of Medicine, Byung-Joo Park, MD, Sue K. Park, MD and Ju Yeon Lee.

**Data Coordinating Center.** Medical Research Collaborating Center, Seoul National University Hospital and Seoul National University College of Medicine, Joongyub Lee, MD,

Dayeon Nam, RN, Soohye Kang, MSc and Heejung Ahn, RN. **Central Laboratory**. Dong Hee Seo, MD, and Dae Yeon Cho, PhD, LabGenomics, Korea. **Biobank**. Korea Biobank, Korea Centers for Disease Control and Prevention, Osong, Korea. **Korea Center for Disease Control and Prevention**. Go Un Yeong, Kim Yeong Taek, Lee Hyejin, Ahn Eun Mi and Jeon Seo Heui.

## Author Contributions

**Conceptualization:** CSK SWK.

**Formal analysis:** CSK.

**Funding acquisition:** CSK CA SWK.

**Investigation:** CSK EHB SKM.

**Project administration:** SWK CA.

**Resources:** SHH KHC JL DWC KHO CA.

**Supervision:** CSK SWK.

**Writing – original draft:** CSK.

**Writing – review & editing:** CSK EHB SKM SWK.

## References

1. Fried LF, Biggs ML, Shlipak MG, Seliger S, Kestenbaum B, Stehman-Breen C, et al. Association of kidney function with incident hip fracture in older adults. *J Am Soc Nephrol*. 2007; 18:282–6. doi: [10.1681/ASN.2006050546](https://doi.org/10.1681/ASN.2006050546) PMID: [17167115](https://pubmed.ncbi.nlm.nih.gov/17167115/)
2. Jassal SK, von Muhlen D, Barrett-Connor E. Measures of renal function, BMD, bone loss, and osteoporotic fracture in older adults: the Rancho Bernardo study. *J Bone Miner Res*. 2007; 22:203–10. doi: [10.1359/jbmr.061014](https://doi.org/10.1359/jbmr.061014) PMID: [17059370](https://pubmed.ncbi.nlm.nih.gov/17059370/)
3. Kidney Disease: Improving Global Outcomes CKD-MBDWG. KDIGO clinical practice guideline for the diagnosis, evaluation, prevention, and treatment of Chronic Kidney Disease-Mineral and Bone Disorder (CKD-MBD). *Kidney Int Suppl*. 2009:S1–130.
4. Bucur RC, Panjwani DD, Turner L, Rader T, West SL, Jamal SA. Low bone mineral density and fractures in stages 3–5 CKD: an updated systematic review and meta-analysis. *Osteoporos Int*. 2015; 26:449–58. doi: [10.1007/s00198-014-2813-3](https://doi.org/10.1007/s00198-014-2813-3) PMID: [25477230](https://pubmed.ncbi.nlm.nih.gov/25477230/)
5. West SL, Lok CE, Langsetmo L, Cheung AM, Szabo E, Pearce D, et al. Bone mineral density predicts fractures in chronic kidney disease. *J Bone Miner Res*. 2015; 30:913–9. doi: [10.1002/jbmr.2406](https://doi.org/10.1002/jbmr.2406) PMID: [25400209](https://pubmed.ncbi.nlm.nih.gov/25400209/)
6. Yenchek RH, Ix JH, Shlipak MG, Bauer DC, Rianon NJ, Kritchevsky SB, et al. Bone mineral density and fracture risk in older individuals with CKD. *Clin J Am Soc Nephrol*. 2012; 7:1130–6. doi: [10.2215/CJN.12871211](https://doi.org/10.2215/CJN.12871211) PMID: [22516286](https://pubmed.ncbi.nlm.nih.gov/22516286/)
7. Simonet WS, Lacey DL, Dunstan CR, Kelley M, Chang MS, Luthy R, et al. Osteoprotegerin: a novel secreted protein involved in the regulation of bone density. *Cell*. 1997; 89:309–19. PMID: [9108485](https://pubmed.ncbi.nlm.nih.gov/9108485/)
8. Morony S, Tintut Y, Zhang Z, Cattley RC, Van G, Dwyer D, et al. Osteoprotegerin inhibits vascular calcification without affecting atherosclerosis in ldlr(-/-) mice. *Circulation*. 2008; 117:411–20. doi: [10.1161/CIRCULATIONAHA.107.707380](https://doi.org/10.1161/CIRCULATIONAHA.107.707380) PMID: [18172035](https://pubmed.ncbi.nlm.nih.gov/18172035/)
9. Boyle WJ, Simonet WS, Lacey DL. Osteoclast differentiation and activation. *Nature*. 2003; 423:337–42. doi: [10.1038/nature01658](https://doi.org/10.1038/nature01658) PMID: [12748652](https://pubmed.ncbi.nlm.nih.gov/12748652/)
10. Collin-Osdoby P. Regulation of vascular calcification by osteoclast regulatory factors RANKL and osteoprotegerin. *Circ Res*. 2004; 95:1046–57. doi: [10.1161/01.RES.0000149165.99974.12](https://doi.org/10.1161/01.RES.0000149165.99974.12) PMID: [15564564](https://pubmed.ncbi.nlm.nih.gov/15564564/)
11. Kim JH, Kim N. Signaling Pathways in Osteoclast Differentiation. *Chonnam Med J*. 2016; 52:12–7. doi: [10.4068/cmj.2016.52.1.12](https://doi.org/10.4068/cmj.2016.52.1.12) PMID: [26865996](https://pubmed.ncbi.nlm.nih.gov/26865996/)
12. Zauli G, Corallini F, Bossi F, Fischetti F, Durigutto P, Celeghini C, et al. Osteoprotegerin increases leukocyte adhesion to endothelial cells both in vitro and in vivo. *Blood*. 2007; 110:536–43. doi: [10.1182/blood-2007-01-068395](https://doi.org/10.1182/blood-2007-01-068395) PMID: [17363729](https://pubmed.ncbi.nlm.nih.gov/17363729/)

13. Kiechl S, Schett G, Wenning G, Redlich K, Oberhollenzer M, Mayr A, et al. Osteoprotegerin is a risk factor for progressive atherosclerosis and cardiovascular disease. *Circulation*. 2004; 109:2175–80. doi: [10.1161/01.CIR.0000127957.43874.BB](https://doi.org/10.1161/01.CIR.0000127957.43874.BB) PMID: [15117849](https://pubmed.ncbi.nlm.nih.gov/15117849/)
14. Mikami S, Hamano T, Fujii N, Nagasawa Y, Isaka Y, Moriyama T, et al. Serum osteoprotegerin as a screening tool for coronary artery calcification score in diabetic pre-dialysis patients. *Hypertens Res*. 2008; 31:1163–70. doi: [10.1291/hyres.31.1163](https://doi.org/10.1291/hyres.31.1163) PMID: [18716364](https://pubmed.ncbi.nlm.nih.gov/18716364/)
15. Jiang JQ, Lin S, Xu PC, Zheng ZF, Jia JY. Serum osteoprotegerin measurement for early diagnosis of chronic kidney disease-mineral and bone disorder. *Nephrology (Carlton)*. 2011; 16:588–94.
16. Oh KH, Park SK, Park HC, Chin HJ, Chae DW, Choi KH, et al. KNOW-CKD (KoreaN cohort study for Outcome in patients With Chronic Kidney Disease): design and methods. *BMC Nephrol*. 2014; 15:80. doi: [10.1186/1471-2369-15-80](https://doi.org/10.1186/1471-2369-15-80) PMID: [24884708](https://pubmed.ncbi.nlm.nih.gov/24884708/)
17. Wade SW, Strader C, Fitzpatrick LA, Anthony MS, O'Malley CD. Estimating prevalence of osteoporosis: examples from industrialized countries. *Arch Osteoporos*. 2014; 9:182. doi: [10.1007/s11657-014-0182-3](https://doi.org/10.1007/s11657-014-0182-3) PMID: [24847682](https://pubmed.ncbi.nlm.nih.gov/24847682/)
18. Yun BH, Choi YR, Choi YS, Cho S, Lee BS, Seo SK. Age at First Delivery and Osteoporosis Risk in Korean Postmenopausal Women: The 2008–2011 Korea National Health and Nutrition Examination Survey (KNHANES). *PLoS One*. 2015; 10:e0123665. doi: [10.1371/journal.pone.0123665](https://doi.org/10.1371/journal.pone.0123665) PMID: [25946162](https://pubmed.ncbi.nlm.nih.gov/25946162/)
19. Levey AS, Coresh J, Greene T, Stevens LA, Zhang YL, Hendriksen S, et al. Using standardized serum creatinine values in the modification of diet in renal disease study equation for estimating glomerular filtration rate. *Ann Intern Med*. 2006; 145:247–54. PMID: [16908915](https://pubmed.ncbi.nlm.nih.gov/16908915/)
20. Edwards MH, Dennison EM, Aihie Sayer A, Fielding R, Cooper C. Osteoporosis and sarcopenia in older age. *Bone*. 2015; 80:126–30. doi: [10.1016/j.bone.2015.04.016](https://doi.org/10.1016/j.bone.2015.04.016) PMID: [25886902](https://pubmed.ncbi.nlm.nih.gov/25886902/)
21. Bucay N, Sarosi I, Dunstan CR, Morony S, Tarpley J, Capparelli C, et al. osteoprotegerin-deficient mice develop early onset osteoporosis and arterial calcification. *Genes Dev*. 1998; 12:1260–8. PMID: [9573043](https://pubmed.ncbi.nlm.nih.gov/9573043/)
22. Min H, Morony S, Sarosi I, Dunstan CR, Capparelli C, Scully S, et al. Osteoprotegerin reverses osteoporosis by inhibiting endosteal osteoclasts and prevents vascular calcification by blocking a process resembling osteoclastogenesis. *J Exp Med*. 2000; 192:463–74. PMID: [10952716](https://pubmed.ncbi.nlm.nih.gov/10952716/)
23. Shimamura M, Nakagami H, Osako MK, Kurinami H, Koriyama H, Zhengda P, et al. OPG/RANKL/RANK axis is a critical inflammatory signaling system in ischemic brain in mice. *Proc Natl Acad Sci U S A*. 2014; 111:8191–6. doi: [10.1073/pnas.1400544111](https://doi.org/10.1073/pnas.1400544111) PMID: [24847069](https://pubmed.ncbi.nlm.nih.gov/24847069/)
24. Ueland T, Yndestad A, Oie E, Florholmen G, Halvorsen B, Froland SS, et al. Dysregulated osteoprotegerin/RANK ligand/RANK axis in clinical and experimental heart failure. *Circulation*. 2005; 111:2461–8. doi: [10.1161/01.CIR.0000165119.62099.14](https://doi.org/10.1161/01.CIR.0000165119.62099.14) PMID: [15883214](https://pubmed.ncbi.nlm.nih.gov/15883214/)
25. Crisafulli A, Micari A, Altavilla D, Saporito F, Sardella A, Passaniti M, et al. Serum levels of osteoprotegerin and RANKL in patients with ST elevation acute myocardial infarction. *Clin Sci (Lond)*. 2005; 109:389–95.
26. Jabbar S, Drury J, Fordham JN, Datta HK, Francis RM, Tuck SP. Osteoprotegerin, RANKL and bone turnover in postmenopausal osteoporosis. *J Clin Pathol*. 2011; 64:354–7. doi: [10.1136/jcp.2010.086595](https://doi.org/10.1136/jcp.2010.086595) PMID: [21307155](https://pubmed.ncbi.nlm.nih.gov/21307155/)
27. Stern A, Laughlin GA, Bergstrom J, Barrett-Connor E. The sex-specific association of serum osteoprotegerin and receptor activator of nuclear factor kappaB ligand with bone mineral density in older adults: the Rancho Bernardo study. *Eur J Endocrinol*. 2007; 156:555–62. doi: [10.1530/EJE-06-0753](https://doi.org/10.1530/EJE-06-0753) PMID: [17468191](https://pubmed.ncbi.nlm.nih.gov/17468191/)
28. Khosla S, Arrighi HM, Melton LJ 3rd, Atkinson EJ, O'Fallon WM, Dunstan C, et al. Correlates of osteoprotegerin levels in women and men. *Osteoporos Int*. 2002; 13:394–9. PMID: [12086350](https://pubmed.ncbi.nlm.nih.gov/12086350/)
29. Uemura H, Yasui T, Miyatani Y, Yamada M, Hiyoshi M, Arisawa K, et al. Circulating profiles of osteoprotegerin and soluble receptor activator of nuclear factor kappaB ligand in post-menopausal women. *J Endocrinol Invest*. 2008; 31:163–8. PMID: [18362509](https://pubmed.ncbi.nlm.nih.gov/18362509/)
30. Oh KW, Rhee EJ, Lee WY, Kim SW, Baek KH, Kang MI, et al. Circulating osteoprotegerin and receptor activator of NF-kappaB ligand system are associated with bone metabolism in middle-aged males. *Clin Endocrinol (Oxf)*. 2005; 62:92–8.
31. Fahrleitner A, Prenner G, Leeb G, Tscheliessnigg KH, Pischinger-Solkner C, Obermayer-Pietsch B, et al. Serum osteoprotegerin is a major determinant of bone density development and prevalent vertebral fracture status following cardiac transplantation. *Bone*. 2003; 32:96–106. PMID: [12584041](https://pubmed.ncbi.nlm.nih.gov/12584041/)
32. Szulc P, Hofbauer LC, Heufelder AE, Roth S, Delmas PD. Osteoprotegerin serum levels in men: correlation with age, estrogen, and testosterone status. *J Clin Endocrinol Metab*. 2001; 86:3162–5. doi: [10.1210/jcem.86.7.7657](https://doi.org/10.1210/jcem.86.7.7657) PMID: [11443182](https://pubmed.ncbi.nlm.nih.gov/11443182/)

33. Fahrleitner-Pammer A, Dobnig H, Piswanger-Soelkner C, Bonelli C, Dimai HP, Leeb G, et al. Osteoprotegerin serum levels in women: correlation with age, bone mass, bone turnover and fracture status. *Wien Klin Wochenschr.* 2003; 115:291–7. PMID: [12793029](#)
34. Kudlacek S, Schneider B, Woloszczuk W, Pietschmann P, Willvonseder R, Austrian Study Group on Normative Values of Bone M. Serum levels of osteoprotegerin increase with age in a healthy adult population. *Bone.* 2003; 32:681–6. PMID: [12810175](#)
35. Browner WS, Lui LY, Cummings SR. Associations of serum osteoprotegerin levels with diabetes, stroke, bone density, fractures, and mortality in elderly women. *J Clin Endocrinol Metab.* 2001; 86:631–7. doi: [10.1210/jcem.86.2.7192](#) PMID: [11158021](#)
36. Fahrleitner-Pammer A, Dobnig H, Dimai HP, Holzer H, Benesch T, Borchhardt K, et al. The effect of RANKL and OPG on bone mineral density in pre-dialysis chronic renal failure. *Clin Nephrol.* 2009; 71:652–9. PMID: [19473634](#)
37. Lindergard B, Johnell O, Nilsson BE, Wiklund PE. Studies of bone morphology, bone densitometry and laboratory data in patients on maintenance hemodialysis treatment. *Nephron.* 1985; 39:122–9. PMID: [3974774](#)
38. Hofbauer LC, Khosla S, Dunstan CR, Lacey DL, Spelsberg TC, Riggs BL. Estrogen stimulates gene expression and protein production of osteoprotegerin in human osteoblastic cells. *Endocrinology.* 1999; 140:4367–70. doi: [10.1210/endo.140.9.7131](#) PMID: [10465311](#)
39. Bord S, Ireland DC, Beavan SR, Compston JE. The effects of estrogen on osteoprotegerin, RANKL, and estrogen receptor expression in human osteoblasts. *Bone.* 2003; 32:136–41. PMID: [12633785](#)
40. Saika M, Inoue D, Kido S, Matsumoto T. 17beta-estradiol stimulates expression of osteoprotegerin by a mouse stromal cell line, ST-2, via estrogen receptor-alpha. *Endocrinology.* 2001; 142:2205–12. doi: [10.1210/endo.142.6.8220](#) PMID: [11356664](#)
41. Hofbauer LC, Hicok KC, Chen D, Khosla S. Regulation of osteoprotegerin production by androgens and anti-androgens in human osteoblastic lineage cells. *Eur J Endocrinol.* 2002; 147:269–73. PMID: [12153751](#)
42. Chen Q, Kaji H, Kanatani M, Sugimoto T, Chihara K. Testosterone increases osteoprotegerin mRNA expression in mouse osteoblast cells. *Horm Metab Res.* 2004; 36:674–8. doi: [10.1055/s-2004-826013](#) PMID: [15523591](#)
43. Ho LT, Sprague SM. Women and CKD-mineral and bone disorder. *Adv Chronic Kidney Dis.* 2013; 20:423–6. doi: [10.1053/j.ackd.2013.06.007](#) PMID: [23978548](#)
44. Nottestad SY, Baumel JJ, Kimmel DB, Recker RR, Heaney RP. The proportion of trabecular bone in human vertebrae. *J Bone Miner Res.* 1987; 2:221–9. doi: [10.1002/jbmr.5650020309](#) PMID: [3455169](#)
